# Supplementary material
Source: HighWire-hosted journal article supplement (https://genome.cshlp.org/content/suppl/2012/08/28/22.9.1646)
Supplement: rules_2.pdf [file rules_2.pdf]

# RuleFit3 rules for GENOME/2011/134767

## GM12878

The rules learned on cell line GM12878.

RuleFit rules in order of importance

Rule 1: 2 variables

support = 0.4572      coeff = -0.4175      importance = 100.0

GM12878 PolyA+ Cytosol Rep1: range = -0.9900E+36 1.414

GM12878 PolyA+ Whole Cell Rep1: range = -0.9900E+36 2.226

Rule 2: 1 variables

support = 0.5265      coeff = 0.3604      importance = 86.52

GM12878 PolyA- Cytosol Rep1: range = 0.5171E-01 7.420

Rule 3: 2 variables

support = 0.2466      coeff = -0.3858      importance = 79.95

GM12878 PolyA+ Cytosol Rep1: range = -0.9900E+36 0.1777E-02

GM12878 PolyA- Cytosol Rep1: range = -0.9900E+36 0.6031E-01

Rule 4: 2 variables

support = 0.4682      coeff = -0.3085      importance = 74.00

GM12878 PolyA+ Nucleus Rep1: range = -0.9900E+36 2.512

GM12878 PolyA+ Whole Cell Rep1: range = -0.9900E+36 1.519

Rule 5: 2 variables

support = 0.2604      coeff = 0.2564      importance = 54.10

GM12878 PolyA- Cytosol Rep1: range = 0.5648E-01 0.9900E+36

GM12878 PolyA+ Whole Cell Rep1: range = 7.615 0.9900E+36

Rule 6: 2 variables

support = 0.5248      coeff = -0.2247      importance = 53.95

GM12878 PolyA+ Nucleus Rep1: range = -0.9900E+36 3.692

GM12878 PolyA+ Whole Cell Rep1: range = -0.9900E+36 3.270

Rule 7: 2 variables

support = 0.4958      coeff = 0.2008      importance = 48.27

GM12878 PolyA+ Cytosol Rep1: range = 1.894 0.9900E+36

GM12878 PolyA- Whole Cell Rep1: range = -0.9900E+36 62.07

---

Rule 8: 1 variables  
support = 0.4759      coeff = -0.1473      importance = 35.37  
GM12878 PolyA+ Nucleus Rep1: range = -0.9900E+36 1.078

Rule 9: 1 variables  
support = 0.2544      coeff = -0.1545      importance = 32.35  
GM12878 PolyA+ Cytosol Rep1: range = -0.9900E+36 0.2567E-02

Rule 10: 2 variables  
support = 0.2711      coeff = 0.1464      importance = 31.29  
GM12878 PolyA+ Cytosol Rep1: range = 7.855 0.9900E+36  
GM12878 PolyA- Nucleus Rep1: range = -0.9900E+36 17.41

Rule 11: 2 variables  
support = 0.1967      coeff = 0.1599      importance = 30.57  
GM12878 PolyA- Nucleus Rep1: range = -0.9900E+36 4.746  
GM12878 PolyA- Whole Cell Rep1: range = 3.384 0.9900E+36

Rule 12: 2 variables  
support = 0.2335      coeff = 0.1334      importance = 27.14  
GM12878 PolyA+ Cytosol Rep1: range = 0.2572E-02 14.13  
GM12878 PolyA- Nucleus Rep1: range = -0.9900E+36 0.2977

Rule 13: 2 variables  
support = 0.7749E-01      coeff = 0.2031      importance = 26.11  
GM12878 PolyA- Cytosol Rep1: range = 0.6047E-01 0.9900E+36  
GM12878 PolyA- Whole Cell Rep1: range = 0.8399 1.569

Rule 14: 2 variables  
support = 0.4250      coeff = 0.1074      importance = 25.51  
GM12878 PolyA- Cytosol Rep1: range = 0.9959E-01 0.9900E+36  
GM12878 PolyA- Whole Cell Rep1: range = 1.054 0.9900E+36

Rule 15: 1 variables  
support = 0.5478      coeff = -0.1065      importance = 25.49  
GM12878 PolyA- Cytosol Rep1: range = -0.9900E+36 0.1017

Rule 16: 2 variables  
support = 0.1805      coeff = 0.1375      importance = 25.42  
GM12878 PolyA+ Cytosol Rep1: range = 0.4503E-01 0.9900E+36  
GM12878 PolyA- Nucleus Rep1: range = 0.1738E-01 0.4517

Rule 17: 2 variables  
support = 0.4689      coeff = 0.8915E-01      importance = 21.39  
GM12878 PolyA- Cytosol Rep1: range = 0.8340E-01 0.9900E+36  
GM12878 PolyA+ Whole Cell Rep1: range = 0.6053 0.9900E+36

Rule 18: 1 variables  
support = 0.7806      coeff = -0.1074      importance = 21.36

---

GM12878 PolyA+ Whole Cell Rep1: range = -0.9900E+36 9.827

Rule 19: 5 variables

support = 0.1660 coeff = -0.1050 importance = 18.78

GM12878 PolyA+ Cytosol Rep1: range = -0.9900E+36 0.5285E-03

GM12878 PolyA- Cytosol Rep1: range = -0.9900E+36 0.3002E-02

GM12878 PolyA- Nucleus Rep1: range = -0.9900E+36 0.7770E-03

GM12878 PolyA+ Whole Cell Rep1: range = -0.9900E+36 0.8625E-03

GM12878 PolyA- Whole Cell Rep1: range = -0.9900E+36 0.7150E-03

Rule 20: 2 variables

support = 0.1256 coeff = -0.1157 importance = 18.43

GM12878 PolyA+ Cytosol Rep1: range = 4.943 16.20

GM12878 PolyA+ Whole Cell Rep1: range = -0.9900E+36 9.723

Rule 21: 1 variables

support = 0.3273 coeff = -0.7678E-01 importance = 17.32

GM12878 PolyA- Cytosol Rep1: range = -0.9900E+36 0.5850E-03

Rule 22: 1 variables

support = 0.2541 coeff = 0.7217E-01 importance = 15.11

GM12878 PolyA- Cytosol Rep1: range = 0.2908 0.9900E+36

Rule 23: 3 variables

support = 0.7997E-01 coeff = 0.1148 importance = 14.97

GM12878 PolyA+ Nucleus Rep1: range = 2.193 0.9900E+36

GM12878 PolyA+ Whole Cell Rep1: range = -0.9900E+36 5.130

GM12878 PolyA- Whole Cell Rep1: range = 1.887 0.9900E+36

Rule 24: 1 variables

support = 0.5414E-01 coeff = -0.1363 importance = 14.82

GM12878 PolyA+ Nucleus Rep1: range = 0.5228 1.073

Rule 25: 1 variables

support = 0.1104 coeff = 0.9415E-01 importance = 14.19

GM12878 PolyA- Whole Cell Rep1: range = 0.7943 1.705

Rule 26: 1 variables

support = 0.1539 coeff = 0.7883E-01 importance = 13.68

GM12878 PolyA+ Whole Cell Rep1: range = 14.46 0.9900E+36

Rule 27: 2 variables

support = 0.4490 coeff = 0.5300E-01 importance = 12.67

GM12878 PolyA- Cytosol Rep1: range = 0.7193E-01 0.9900E+36

GM12878 PolyA+ Nucleus Rep1: range = 1.421 0.9900E+36

Rule 28: 1 variables

support = 0.1359 coeff = 0.7628E-01 importance = 12.57

GM12878 PolyA- Cytosol Rep1: range = 0.5836 15.54

---

Rule 29: 2 variables  
support = 0.1479 coeff = 0.7346E-01 importance = 12.54  
GM12878 PolyA+ Cytosol Rep1: range = 15.91 0.9900E+36  
GM12878 PolyA+ Nucleus Rep1: range = 2.885 65.99

Rule 30: linear GM12878 PolyA+ Whole Cell Rep1  
std = 15.22 coeff = 0.1706E-02 importance = 12.49

Rule 31: 1 variables  
support = 0.2463 coeff = -0.5267E-01 importance = 10.91  
GM12878 PolyA- Nucleus Rep1: range = -0.9900E+36 0.1439E-02

Rule 32: 1 variables  
support = 0.5425 coeff = -0.3093E-01 importance = 7.409  
GM12878 PolyA- Cytosol Rep1: range = -0.9900E+36 0.9828E-01

Rule 33: 2 variables  
support = 0.3447 coeff = 0.3158E-01 importance = 7.215  
GM12878 PolyA+ Cytosol Rep1: range = 5.183 0.9900E+36  
GM12878 PolyA- Cytosol Rep1: range = 0.9280E-01 0.9900E+36

Rule 34: 2 variables  
support = 0.4667 coeff = 0.2563E-01 importance = 6.148  
GM12878 PolyA- Cytosol Rep1: range = 0.8559E-01 0.9900E+36  
GM12878 PolyA+ Whole Cell Rep1: range = 0.5758 0.9900E+36

Rule 35: 3 variables  
support = 0.6122E-01 coeff = 0.4540E-01 importance = 5.233  
GM12878 PolyA+ Cytosol Rep1: range = 2.254 5.316  
GM12878 PolyA- Nucleus Rep1: range = -0.9900E+36 1.830  
GM12878 PolyA+ Whole Cell Rep1: range = 0.7034 4.968

Rule 36: 1 variables  
support = 0.6727 coeff = 0.2113E-01 importance = 4.768  
GM12878 PolyA- Cytosol Rep1: range = 0.7055E-03 0.9900E+36

Rule 37: 2 variables  
support = 0.4459E-01 coeff = -0.4430E-01 importance = 4.396  
GM12878 PolyA+ Nucleus Rep1: range = 0.5230 1.088  
GM12878 PolyA+ Whole Cell Rep1: range = -0.9900E+36 4.466

Rule 38: 2 variables  
support = 0.5662 coeff = -0.1679E-01 importance = 4.001  
GM12878 PolyA+ Cytosol Rep1: range = -0.9900E+36 7.353  
GM12878 PolyA+ Whole Cell Rep1: range = -0.9900E+36 3.434

Rule 39: 2 variables  
support = 0.1525 coeff = -0.2135E-01 importance = 3.690  
GM12878 PolyA+ Cytosol Rep1: range = -0.9900E+36 11.27  
GM12878 PolyA+ Nucleus Rep1: range = 3.379 0.9900E+36

---

Rule 40: 2 variables  
support = 0.5520E-01 coeff = 0.3123E-01 importance = 3.428  
GM12878 PolyA- Cytosol Rep1: range = -0.9900E+36 0.1810  
GM12878 PolyA- Whole Cell Rep1: range = 0.9312 1.515

Rule 41: 2 variables  
support = 0.1610 coeff = 0.1836E-01 importance = 3.244  
GM12878 PolyA+ Cytosol Rep1: range = 0.2572E-02 14.13  
GM12878 PolyA- Nucleus Rep1: range = -0.9900E+36 0.1249

Rule 42: 1 variables  
support = 0.6939 coeff = -0.1118E-01 importance = 2.478  
GM12878 PolyA- Whole Cell Rep1: range = -0.9900E+36 2.731

Rule 43: 2 variables  
support = 0.2420 coeff = 0.1089E-01 importance = 2.243  
GM12878 PolyA- Cytosol Rep1: range = 0.5648E-01 0.9900E+36  
GM12878 PolyA+ Whole Cell Rep1: range = 7.615 98.07

Rule 44: 1 variables  
support = 0.2679 coeff = -0.1035E-01 importance = 2.204  
GM12878 PolyA+ Cytosol Rep1: range = -0.9900E+36 0.5157E-02

Rule 45: 1 variables  
support = 0.6440E-01 coeff = 0.1655E-01 importance = 1.954  
GM12878 PolyA+ Cytosol Rep1: range = 7.350 10.37

Rule 46: 1 variables  
support = 0.7856E-01 coeff = -0.1408E-01 importance = 1.821  
GM12878 PolyA- Whole Cell Rep1: range = 0.6297E-01 0.3807

Rule 47: 1 variables  
support = 0.5591E-01 coeff = 0.1639E-01 importance = 1.811  
GM12878 PolyA+ Nucleus Rep1: range = 0.1689 0.6473

Rule 48: 3 variables  
support = 0.1953 coeff = 0.8922E-02 importance = 1.701  
GM12878 PolyA- Cytosol Rep1: range = 0.1310 0.9900E+36  
GM12878 PolyA+ Nucleus Rep1: range = 3.113 19.99  
GM12878 PolyA- Whole Cell Rep1: range = -0.9900E+36 10.06

Rule 49: 2 variables  
support = 0.1210 coeff = 0.1076E-01 importance = 1.687  
GM12878 PolyA+ Cytosol Rep1: range = 0.2572E-02 14.13  
GM12878 PolyA- Nucleus Rep1: range = -0.9900E+36 0.5204E-01

Rule 50: 2 variables  
support = 0.2190 coeff = -0.8142E-02 importance = 1.619  
GM12878 PolyA+ Cytosol Rep1: range = 2.512 0.9900E+36

---

GM12878 PolyA- Cytosol Rep1: range = -0.9900E+36 0.2846

Rule 51: 2 variables

support = 0.1840E-01 coeff = -0.2431E-01 importance = 1.571

GM12878 PolyA- Cytosol Rep1: range = 0.1479 0.3850

GM12878 PolyA+ Whole Cell Rep1: range = 5.440 6.898

Rule 52: 1 variables

support = 0.4636E-01 coeff = -0.1456E-01 importance = 1.472

GM12878 PolyA- Whole Cell Rep1: range = 2.116 2.731

Rule 53: 2 variables

support = 0.9590E-01 coeff = -0.9638E-02 importance = 1.364

GM12878 PolyA+ Nucleus Rep1: range = 0.7542 2.381

GM12878 PolyA+ Whole Cell Rep1: range = -0.9900E+36 5.897

Rule 54: 1 variables

support = 0.6727 coeff = 0.5855E-02 importance = 1.321

GM12878 PolyA- Cytosol Rep1: range = 0.5850E-03 0.9900E+36

Rule 55: 2 variables

support = 0.2611 coeff = -0.5969E-02 importance = 1.261

GM12878 PolyA- Cytosol Rep1: range = -0.9900E+36 0.6284E-01

GM12878 PolyA- Whole Cell Rep1: range = -0.9900E+36 0.7795E-03

Rule 56: 1 variables

support = 0.1033 coeff = 0.8211E-02 importance = 1.202

GM12878 PolyA+ Cytosol Rep1: range = 24.72 0.9900E+36

Rule 57: 2 variables

support = 0.4459E-01 coeff = -0.1210E-01 importance = 1.201

GM12878 PolyA+ Nucleus Rep1: range = -0.9900E+36 0.1476

GM12878 PolyA- Whole Cell Rep1: range = 0.2909E-01 3.384

Rule 58: 1 variables

support = 0.3539E-01 coeff = -0.1240E-01 importance = 1.101

GM12878 PolyA- Whole Cell Rep1: range = 1.515 1.885

Rule 59: 2 variables

support = 0.2208 coeff = -0.5369E-02 importance = 1.071

GM12878 PolyA+ Cytosol Rep1: range = -0.9900E+36 15.91

GM12878 PolyA+ Nucleus Rep1: range = 2.885 65.99

Rule 60: 2 variables

support = 0.8776E-01 coeff = -0.7544E-02 importance = 1.026

GM12878 PolyA+ Cytosol Rep1: range = -0.9900E+36 0.8626

GM12878 PolyA+ Whole Cell Rep1: range = 0.5346E-01 2.226

Rule 61: 2 variables

support = 0.2353 coeff = 0.5004E-02 importance = 1.021

---

GM12878 PolyA- Cytosol Rep1: range = 0.9959E-01 0.9900E+36

GM12878 PolyA- Whole Cell Rep1: range = 1.054 5.165

Rule 62: 1 variables

support = 0.7010 coeff = -0.4209E-02 importance = 0.9264

GM12878 PolyA+ Whole Cell Rep1: range = -0.9900E+36 6.463

Rule 63: 2 variables

support = 0.2891 coeff = -0.4126E-02 importance = 0.8992

GM12878 PolyA- Cytosol Rep1: range = -0.9900E+36 0.1017

GM12878 PolyA- Nucleus Rep1: range = 0.2844E-02 0.9900E+36

Rule 64: 1 variables

support = 0.2268 coeff = -0.4281E-02 importance = 0.8618

GM12878 PolyA- Whole Cell Rep1: range = 1.515 5.444

Rule 65: 2 variables

support = 0.1185 coeff = 0.5529E-02 importance = 0.8592

GM12878 PolyA- Cytosol Rep1: range = -0.9900E+36 0.2786

GM12878 PolyA+ Nucleus Rep1: range = 1.958 5.520

Rule 66: 1 variables

support = 0.2665 coeff = -0.3948E-02 importance = 0.8392

GM12878 PolyA+ Cytosol Rep1: range = -0.9900E+36 0.4700E-02

Rule 67: 1 variables

support = 0.7123 coeff = -0.3818E-02 importance = 0.8310

GM12878 PolyA+ Whole Cell Rep1: range = -0.9900E+36 6.774

Rule 68: 1 variables

support = 0.3273 coeff = -0.3246E-02 importance = 0.7323

GM12878 PolyA- Cytosol Rep1: range = -0.9900E+36 0.5850E-03

Rule 69: 1 variables

support = 0.3273 coeff = -0.3181E-02 importance = 0.7176

GM12878 PolyA- Cytosol Rep1: range = -0.9900E+36 0.7055E-03

Rule 70: 1 variables

support = 0.3273 coeff = -0.3154E-02 importance = 0.7116

GM12878 PolyA- Cytosol Rep1: range = -0.9900E+36 0.5720E-03

Rule 71: 3 variables

support = 0.4282E-01 coeff = 0.6817E-02 importance = 0.6635

GM12878 PolyA+ Cytosol Rep1: range = -0.9900E+36 4.082

GM12878 PolyA- Cytosol Rep1: range = 0.5096E-01 0.9900E+36

GM12878 PolyA- Whole Cell Rep1: range = -0.9900E+36 0.7943

Rule 72: 2 variables

support = 0.3680E-01 coeff = 0.7304E-02 importance = 0.6611

GM12878 PolyA+ Cytosol Rep1: range = 1.839 0.9900E+36

---

GM12878 PolyA+ Whole Cell Rep1: range = -0.9900E+36 1.306

Rule 73: 1 variables  
support = 0.3715E-01 coeff = -0.7133E-02 importance = 0.6486  
GM12878 PolyA+ Whole Cell Rep1: range = 5.087 6.381

Rule 74: linear GM12878 PolyA- Whole Cell Rep1  
std = 6.190 coeff = 0.2148E-03 importance = 0.6392

Rule 75: 2 variables  
support = 0.4972 coeff = 0.2599E-02 importance = 0.6246  
GM12878 PolyA- Cytosol Rep1: range = 0.6637E-01 0.9900E+36  
GM12878 PolyA- Nucleus Rep1: range = 0.1670 0.9900E+36

Rule 76: 1 variables  
support = 0.1929 coeff = -0.3151E-02 importance = 0.5978  
GM12878 PolyA- Whole Cell Rep1: range = 1.204 3.651

Rule 77: 2 variables  
support = 0.1897 coeff = 0.2897E-02 importance = 0.5460  
GM12878 PolyA- Cytosol Rep1: range = 0.9139E-01 0.5294  
GM12878 PolyA- Nucleus Rep1: range = 0.6824 4.775

Rule 78: 1 variables  
support = 0.1104 coeff = 0.2809E-02 importance = 0.4232  
GM12878 PolyA+ Cytosol Rep1: range = 23.28 0.9900E+36

Rule 79: 1 variables  
support = 0.3160 coeff = -0.1106E-02 importance = 0.2473  
GM12878 PolyA+ Cytosol Rep1: range = -0.9900E+36 0.2283E-01

Rule 80: 1 variables  
support = 0.9342E-01 coeff = 0.1583E-02 importance = 0.2215  
GM12878 PolyA- Whole Cell Rep1: range = 0.1325E-02 0.5908E-01

Rule 81: 1 variables  
support = 0.1380E-01 coeff = 0.3542E-02 importance = 0.1986  
GM12878 PolyA- Nucleus Rep1: range = 0.1439E-02 0.2771E-02

Rule 82: 1 variables  
support = 0.2795E-01 coeff = 0.1951E-02 importance = 0.1547  
GM12878 PolyA+ Whole Cell Rep1: range = 0.8625E-03 0.6060E-02

Rule 83: 2 variables  
support = 0.2983 coeff = 0.6333E-03 importance = 0.1393  
GM12878 PolyA- Cytosol Rep1: range = 0.9139E-01 0.5294  
GM12878 PolyA- Nucleus Rep1: range = -0.9900E+36 4.775

Rule 84: 1 variables  
support = 0.2877 coeff = 0.1417E-03 importance = 0.3083E-01



---

GM12878 PolyA+ Whole Cell Rep1: range = 6.774 0.9900E+36

Rule 85: 1 variables

support = 0.6794E-01 coeff = -0.1987E-03 importance = 0.2404E-01

GM12878 PolyA+ Whole Cell Rep1: range = 4.700 6.774

Rule 86: 1 variables

support = 0.5556E-01 coeff = -0.1531E-03 importance = 0.1686E-01

GM12878 PolyA- Whole Cell Rep1: range = 1.705 2.329

Rule 87: 1 variables

support = 0.4575 coeff = 0.9197E-12 importance = 0.2203E-09

GM12878 PolyA- Cytosol Rep1: range = 0.9828E-01 0.9900E+36

Rule 88: 1 variables

support = 0.5241 coeff = 0.7382E-12 importance = 0.1772E-09

GM12878 PolyA+ Nucleus Rep1: range = 1.078 0.9900E+36

Rule 89: 1 variables

support = 0.2194 coeff = 0.1032E-12 importance = 0.2053E-10

GM12878 PolyA+ Whole Cell Rep1: range = 9.827 0.9900E+36

Rule 90: 1 variables

support = 0.4522 coeff = 0.2362E-13 importance = 0.5652E-11

GM12878 PolyA- Cytosol Rep1: range = 0.1017 0.9900E+36

Rule 91: 1 variables

support = 0.7537 coeff = 0.1205E-14 importance = 0.2496E-12

GM12878 PolyA- Nucleus Rep1: range = 0.1439E-02 0.9900E+36

Rule 92: 1 variables

support = 0.3061 coeff = 0.7097E-15 importance = 0.1572E-12

GM12878 PolyA- Whole Cell Rep1: range = 2.731 0.9900E+36

Rule 93: 1 variables

support = 0.7335 coeff = 0.4177E-15 importance = 0.8878E-13

GM12878 PolyA+ Cytosol Rep1: range = 0.4700E-02 0.9900E+36

Rule 94: 1 variables

support = 0.2990 coeff = 0.1312E-15 importance = 0.2889E-13

GM12878 PolyA+ Whole Cell Rep1: range = 6.463 0.9900E+36

## K562

The rules learned on cell line K562.

RuleFit rules in order of importance

Rule 1: 2 variables

support = 0.5121 coeff = -0.5007 importance = 100.0

---

K562 PolyA- Cytosol Rep1: range = -0.9900E+36 0.2307  
K562 Total Chromatin Rep1: range = -0.9900E+36 2.546

Rule 2: 2 variables  
support = 0.1898 coeff = 0.5723 importance = 89.69  
K562 PolyA- Cytosol Rep1: range = 0.9916 0.9900E+36  
K562 PolyA- Nucleus Rep1: range = 1.440 22.36

Rule 3: 3 variables  
support = 0.2241 coeff = 0.4663 importance = 77.70  
K562 PolyA+ Cytosol Rep1: range = 0.1265 7.705  
K562 PolyA- Cytosol Rep1: range = 0.8619E-01 0.9900E+36  
K562 PolyA- Nucleus Rep1: range = 0.2296 0.9900E+36

Rule 4: 1 variables  
support = 0.2373 coeff = -0.3726 importance = 63.34  
K562 Total Nucleolus Rep1: range = -0.9900E+36 0.5985E-03

Rule 5: 2 variables  
support = 0.2682 coeff = 0.3556 importance = 62.96  
K562 PolyA- Cytosol Rep1: range = 0.1586 1.132  
K562 Total Nucleoplasm Rep1: range = -0.9900E+36 3.670

Rule 6: 1 variables  
support = 0.3223 coeff = -0.2642 importance = 49.35  
K562 PolyA- Cytosol Rep1: range = -0.9900E+36 0.9036E-02

Rule 7: 2 variables  
support = 0.4062 coeff = -0.2427 importance = 47.64  
K562 PolyA- Cytosol Rep1: range = -0.9900E+36 0.1105  
K562 PolyA- Whole Cell Rep1: range = -0.9900E+36 0.8564

Rule 8: 2 variables  
support = 0.1038 coeff = -0.3074 importance = 37.46  
K562 PolyA+ Nucleus Rep1: range = 1.801 6.689  
K562 Total Chromatin Rep1: range = 0.9476 3.846

Rule 9: 1 variables  
support = 0.5188E-01 coeff = 0.4057 importance = 35.95  
K562 Total Nucleoplasm Rep1: range = 0.3635E-03 0.1487E-01

Rule 10: 2 variables  
support = 0.5364 coeff = -0.1737 importance = 34.60  
K562 PolyA- Cytosol Rep1: range = -0.9900E+36 0.2743  
K562 PolyA- Nucleus Rep1: range = -0.9900E+36 3.199

Rule 11: 2 variables  
support = 0.4746 coeff = 0.1544 importance = 30.80  
K562 PolyA- Cytosol Rep1: range = 0.8525E-01 0.9900E+36  
K562 PolyA- Nucleus Rep1: range = 0.7717 0.9900E+36

---

Rule 12: 2 variables  
support = 0.3433      coeff = 0.1579      importance = 29.96  
K562 PolyA+ Nucleus Rep1: range = 5.586      0.9900E+36  
K562 Total Chromatin Rep1: range = 0.5967      0.9900E+36

Rule 13: linear K562 PolyA+ Nucleus Rep1  
std = 13.41      coeff = 0.5578E-02      importance = 29.90

Rule 14: 3 variables  
support = 0.2980      coeff = 0.1533      importance = 28.02  
K562 PolyA+ Cytosol Rep1: range = 3.735      0.9900E+36  
K562 PolyA+ Nucleus Rep1: range = 1.465      0.9900E+36  
K562 PolyA- Whole Cell Rep1: range = 4.632      0.9900E+36

Rule 15: 2 variables  
support = 0.8609E-01      coeff = -0.2368      importance = 26.55  
K562 PolyA- Cytosol Rep1: range = -0.9900E+36      0.4985E-01  
K562 Total Nucleoplasm Rep1: range = 0.1988E-01      0.9900E+36

Rule 16: 2 variables  
support = 0.2373      coeff = -0.1500      importance = 25.50  
K562 PolyA- Cytosol Rep1: range = -0.9900E+36      0.3426E-01  
K562 Total Nucleoplasm Rep1: range = -0.9900E+36      0.3040E-03

Rule 17: 2 variables  
support = 0.1578      coeff = -0.1726      importance = 25.15  
K562 PolyA- Cytosol Rep1: range = -0.9900E+36      0.2360  
K562 Total Nucleolus Rep1: range = 0.9433E-01      1.103

Rule 18: 2 variables  
support = 0.1600      coeff = 0.1475      importance = 21.61  
K562 PolyA- Cytosol Rep1: range = 1.397      0.9900E+36  
K562 PolyA- Nucleus Rep1: range = -0.9900E+36      23.41

Rule 19: 1 variables  
support = 0.6435      coeff = -0.1082      importance = 20.71  
K562 PolyA- Whole Cell Rep1: range = -0.9900E+36      3.926

Rule 20: 1 variables  
support = 0.3046      coeff = 0.1063      importance = 19.56  
K562 PolyA- Cytosol Rep1: range = 0.6214      0.9900E+36

Rule 21: 3 variables  
support = 0.2296      coeff = 0.1065      importance = 17.89  
K562 PolyA- Cytosol Rep1: range = 0.7621      0.9900E+36  
K562 PolyA+ Nucleus Rep1: range = 3.911      0.9900E+36  
K562 Total Chromatin Rep1: range = 0.9373      0.9900E+36

Rule 22: 4 variables

---

support = 0.1744      coeff = 0.1043      importance = 15.81  
K562 PolyA+ Cytosol Rep1: range = -0.9900E+36    13.81  
K562 PolyA- Cytosol Rep1: range = 0.2219      0.9900E+36  
K562 PolyA+ Nucleus Rep1: range = 1.220      18.95  
K562 Total Nucleolus Rep1: range = -0.9900E+36    3.317

Rule 23:      2 variables  
support = 0.3907      coeff = 0.7255E-01    importance = 14.14  
K562 PolyA- Whole Cell Rep1: range = 1.019      0.9900E+36  
K562 Total Nucleoplasm Rep1: range = -0.9900E+36    4.247

Rule 24:      3 variables  
support = 0.1578      coeff = 0.9210E-01    importance = 13.42  
K562 PolyA- Cytosol Rep1: range = 0.1512      0.9900E+36  
K562 PolyA+ Nucleus Rep1: range = 2.149      17.98  
K562 PolyA+ Whole Cell Rep1: range = -0.9900E+36    11.47

Rule 25:      1 variables  
support = 0.3841      coeff = 0.6722E-01    importance = 13.07  
K562 PolyA- Nucleus Rep1: range = 1.281      23.47

Rule 26:      3 variables  
support = 0.3091      coeff = 0.5877E-01    importance = 10.85  
K562 PolyA+ Whole Cell Rep1: range = 3.884      0.9900E+36  
K562 Total Chromatin Rep1: range = 0.9334      0.9900E+36  
K562 Total Nucleolus Rep1: range = -0.9900E+36    5.077

Rule 27:      1 variables  
support = 0.2230      coeff = 0.5637E-01    importance = 9.376  
K562 PolyA- Nucleus Rep1: range = 3.030      0.9900E+36

Rule 28:      1 variables  
support = 0.7781      coeff = -0.5094E-01    importance = 8.458  
K562 PolyA- Whole Cell Rep1: range = -0.9900E+36    8.602

Rule 29:      1 variables  
support = 0.4404      coeff = -0.3947E-01    importance = 7.829  
K562 PolyA- Whole Cell Rep1: range = -0.9900E+36    0.8564

Rule 30:      1 variables  
support = 0.1634      coeff = 0.4923E-01    importance = 7.273  
K562 PolyA- Whole Cell Rep1: range = 12.87      0.9900E+36

Rule 31:      1 variables  
support = 0.8124      coeff = -0.4605E-01    importance = 7.185  
K562 PolyA- Nucleus Rep1: range = -0.9900E+36    3.497

Rule 32:      3 variables  
support = 0.2219      coeff = -0.3789E-01    importance = 6.291  
K562 PolyA+ Nucleus Rep1: range = 0.7797      9.997

---

K562 PolyA- Nucleus Rep1: range = -0.9900E+36 2.305  
K562 Total Nucleolus Rep1: range = 0.3620 0.9900E+36

Rule 33: 1 variables  
support = 0.3753E-01 coeff = -0.7988E-01 importance = 6.066  
K562 Total Nucleoplasm Rep1: range = 4.227 5.312

Rule 34: 1 variables  
support = 0.3223 coeff = -0.3179E-01 importance = 5.936  
K562 PolyA- Cytosol Rep1: range = -0.9900E+36 0.9039E-02

Rule 35: 2 variables  
support = 0.5607 coeff = 0.2353E-01 importance = 4.666  
K562 PolyA- Cytosol Rep1: range = 0.9129E-01 0.9900E+36  
K562 PolyA- Nucleus Rep1: range = 0.2371 0.9900E+36

Rule 36: 1 variables  
support = 0.5927 coeff = -0.2014E-01 importance = 3.954  
K562 PolyA- Whole Cell Rep1: range = -0.9900E+36 2.987

Rule 37: 2 variables  
support = 0.4680 coeff = -0.1769E-01 importance = 3.528  
K562 PolyA- Cytosol Rep1: range = -0.9900E+36 0.1592  
K562 Total Nucleolus Rep1: range = -0.9900E+36 2.408

Rule 38: 1 variables  
support = 0.7770 coeff = -0.1908E-01 importance = 3.174  
K562 PolyA- Nucleus Rep1: range = -0.9900E+36 3.030

Rule 39: 2 variables  
support = 0.4812 coeff = -0.1398E-01 importance = 2.790  
K562 PolyA- Cytosol Rep1: range = -0.9900E+36 0.2207  
K562 PolyA- Whole Cell Rep1: range = -0.9900E+36 2.935

Rule 40: 1 variables  
support = 0.3565 coeff = 0.6244E-02 importance = 1.195  
K562 PolyA- Whole Cell Rep1: range = 3.932 0.9900E+36

Rule 41: 1 variables  
support = 0.3223 coeff = -0.4765E-02 importance = 0.8899  
K562 PolyA- Cytosol Rep1: range = -0.9900E+36 0.9039E-02

Rule 42: 2 variables  
support = 0.2980 coeff = 0.4736E-02 importance = 0.8656  
K562 PolyA+ Nucleus Rep1: range = 6.689 0.9900E+36  
K562 Total Chromatin Rep1: range = 0.9476 0.9900E+36

Rule 43: 2 variables  
support = 0.4724 coeff = -0.3471E-02 importance = 0.6925  
K562 PolyA+ Cytosol Rep1: range = -0.9900E+36 4.139

---

K562 PolyA- Cytosol Rep1: range = -0.9900E+36 0.1986

Rule 44: 1 variables  
support = 0.4161 coeff = -0.3064E-02 importance = 0.6035  
K562 PolyA- Cytosol Rep1: range = -0.9900E+36 0.9123E-01

Rule 45: 1 variables  
support = 0.4801 coeff = -0.1800E-02 importance = 0.3594  
K562 Total Chromatin Rep1: range = -0.9900E+36 0.5967

Rule 46: 2 variables  
support = 0.3234 coeff = 0.1165E-02 importance = 0.2178  
K562 PolyA+ Nucleus Rep1: range = 1.465 0.9900E+36  
K562 PolyA- Whole Cell Rep1: range = 4.632 0.9900E+36

Rule 47: 1 variables  
support = 0.3046 coeff = 0.7856E-03 importance = 0.1445  
K562 PolyA- Cytosol Rep1: range = 0.6214 0.9900E+36

Rule 48: 1 variables  
support = 0.4404 coeff = -0.6620E-03 importance = 0.1313  
K562 PolyA- Whole Cell Rep1: range = -0.9900E+36 0.8577

Rule 49: 1 variables  
support = 0.2373 coeff = -0.5030E-03 importance = 0.8552E-01  
K562 Total Nucleolus Rep1: range = -0.9900E+36 0.4185E-03

Rule 50: 1 variables  
support = 0.4161 coeff = -0.2731E-03 importance = 0.5380E-01  
K562 PolyA- Cytosol Rep1: range = -0.9900E+36 0.9123E-01

Rule 51: 1 variables  
support = 0.4161 coeff = -0.1771E-03 importance = 0.3488E-01  
K562 PolyA- Cytosol Rep1: range = -0.9900E+36 0.9123E-01

Rule 52: 1 variables  
support = 0.6435 coeff = -0.1663E-03 importance = 0.3183E-01  
K562 PolyA- Whole Cell Rep1: range = -0.9900E+36 3.932

Rule 53: 2 variables  
support = 0.4702 coeff = -0.1068E-03 importance = 0.2131E-01  
K562 PolyA+ Cytosol Rep1: range = -0.9900E+36 7.040  
K562 PolyA- Cytosol Rep1: range = -0.9900E+36 0.1686

Rule 54: 1 variables  
support = 0.4161 coeff = -0.5079E-04 importance = 0.1000E-01  
K562 PolyA- Cytosol Rep1: range = -0.9900E+36 0.9123E-01

Rule 55: 1 variables  
support = 0.4161 coeff = -0.1746E-04 importance = 0.3440E-02

---

K562 PolyA- Cytosol Rep1: range = -0.9900E+36 0.9123E-01

Rule 56: 1 variables

support = 0.3565 coeff = 0.8408E-13 importance = 0.1609E-10

K562 PolyA- Whole Cell Rep1: range = 3.926 0.9900E+36

Rule 57: 1 variables

support = 0.1876 coeff = 0.8711E-14 importance = 0.1359E-11

K562 PolyA- Nucleus Rep1: range = 3.497 0.9900E+36

Rule 58: 1 variables

support = 0.2219 coeff = 0.1681E-15 importance = 0.2791E-13

K562 PolyA- Whole Cell Rep1: range = 8.602 0.9900E+36

Rule 59: 1 variables

support = 0.5839 coeff = 0.2865E-16 importance = 0.5644E-14

K562 PolyA- Cytosol Rep1: range = 0.9123E-01 0.9900E+36

Rule 60: 1 variables

support = 0.5839 coeff = 0.2149E-16 importance = 0.4233E-14

K562 PolyA- Cytosol Rep1: range = 0.9123E-01 0.9900E+36

Rule 61: 1 variables

support = 0.5839 coeff = 0.7164E-17 importance = 0.1411E-14

K562 PolyA- Cytosol Rep1: range = 0.9123E-01 0.9900E+36

Rule 62: 1 variables

support = 0.5839 coeff = 0.3582E-17 importance = 0.7055E-15

K562 PolyA- Cytosol Rep1: range = 0.9123E-01 0.9900E+36
